# Supplementary material for: Characterization of Plasmodium ovale curtisi and P. ovale wallikeri in Western Kenya Utilizing a Novel Species-specific Real-time PCR Assay
Source: PubMed Central journal article supplement (PMC4295880; doi:10.1371/journal.pntd.0003469), 2015-01-15
Supplement: pntd.0003469.s001.pdf [file pntd.0003469.s001.pdf]

| <b><i>P. ovale</i> subspecies</b> | <b><i>Rbp2</i> DNA sequences (5'-3')</b>                                      |
|-----------------------------------|-------------------------------------------------------------------------------|
| <b><i>P. ovale curtisi</i></b>    | CCACAGATAAGAAGTCTCAAGTACGATATTAATGAATTGCTAAGCGAT<br>ATCAATTGCAAACAAAAGTGCTCAA |
| <b><i>P. ovale wallikeri</i></b>  | CCACAGATAAGAAGTCTCAAGTACGATATTAATGAATTGCTAAGCGAT<br>ATCATTGCAAACAAAAGTGCTCAA  |
